# Supplementary material
Source: publisher site journal article supplement (https://www.degruyterbrill.com/publication/isbn/9783110286120/downloadAsset/9783110286120_Inhaltsverzeichnis.pdf)
Supplement: Supplementary file 1 [file 9783110286120_Inhaltsverzeichnis.pdf]

# Inhalt

|                                                   |   |
|---------------------------------------------------|---|
| ANNA HEINZE/ALBERT SCHIRRMEISTER/JULIA WEITBRECHT |   |
| Einleitung .....                                  | 1 |

## 1. Erzählende Literatur

|                                                                                                                                    |    |
|------------------------------------------------------------------------------------------------------------------------------------|----|
| MARKUS STOCK                                                                                                                       |    |
| Alexanders Orte: Narrative »Bewältigungen« und Transformationen<br>in der lateinischen und mittelhochdeutschen Alexanderepik ..... | 9  |
| BENT GEBERT                                                                                                                        |    |
| Narration und Ostension im <i>Trojanerkrieg</i> Konrads von Würzburg .....                                                         | 27 |

## 2. Historiographie

|                                                                                                                                                               |     |
|---------------------------------------------------------------------------------------------------------------------------------------------------------------|-----|
| MARTIN CLAUSS                                                                                                                                                 |     |
| 1066: Als Wilhelm von der Normandie Caesar in den Schatten stellte.<br>Zur Antikentransformation in den <i>Gesta Guillelmi</i> des Wilhelm von Poitiers ..... | 51  |
| PATRICK BAKER                                                                                                                                                 |     |
| »Writing History in Cicero's Shadow« .....                                                                                                                    | 75  |
| RONNY KAISER                                                                                                                                                  |     |
| <i>Sola historia negligitur</i> : Historiographisches Erzählen in Andreas<br>Althamers <i>Scholia</i> zur <i>Germania</i> des Tacitus .....                   | 91  |
| ASAPH BEN-TOV                                                                                                                                                 |     |
| Eine späthumanistische Konfessionalisierung der Antike. Die Griechen<br>in der protestantischen <i>historia universalis</i> .....                             | 117 |

## 3. Bildkunst

|                                                                                                                           |     |
|---------------------------------------------------------------------------------------------------------------------------|-----|
| BIRGIT FRANKE                                                                                                             |     |
| Höfische Antike – Textile Erzählräume und <i>re-enactment</i> des Troja-Mythos<br>im späten 14. und 15. Jahrhundert ..... | 145 |

ANNA HEINZE

Nymphe und Satyr/Venus und Satyr. Zur mythopoetischen  
Adaption eines antiken Motivs in der Renaissance ..... 179

TATJANA BARTSCH

Die Schmiede des Vulkan in den Bildkünsten der Renaissance ..... 197

HANS KÖRNER

Handlungen im Ornament und handelnde Ornamente. Transformationen  
der antiken Groteske in Vorlagestichen des 16. und 17. Jahrhunderts ..... 225

## 5. Drama

JULIA WEITBRECHT

Vergegenwärtigung der Antike. Lucretia in der *Kaiserchronik* und in den  
Römerdramen von Hans Sachs und Jacob Ayrer ..... 243

KIRSTEN POSTERT

Die *tragédie à sujet moderne* in Frankreich (1550–1715). Modernität und  
Aktualität als Transformationsfaktor antiker mythologischer Narrative ..... 263

Autorenverzeichnis ..... 277

Register ..... 281

Abbildungen
